# Supplementary material for: Halloysite clay nanotubes with Fe–Al deposits for the oxidation of benzyl alcohol
Source: Royal Society of Chemistry journal article supplement (doi:10.1039/d2nj02742a), 2022-01-01
Supplement: d2nj02742a1.pdf [file d2nj02742a1.pdf]

## Halloysite clay nanotubes with Fe-Al deposits for oxidation of benzyl alcohol

Vijitha Rajesh Nair<sup>a</sup>, T. Maiyalagan<sup>b</sup> and Suresh S Shendage<sup>\*a</sup>

<sup>a</sup>Department of Chemistry, KETS V. G.Vaze College of Arts, Science, and Commerce, Mithagar Road, Mulund(East), Mumbai -400081, Maharashtra.

<sup>b</sup>Department of Chemistry, SRM Institute of Science and Technology, Kattankulathur - 603 203, India

\*Corresponding author Email: [sureshsshendage@gmail.com](mailto:sureshsshendage@gmail.com)

---

| TABLE OF CONTENT | Page No. |
|------------------|----------|
| NMR Spectra      | 2        |
| MASS Spectra     | 2-5      |
| ICP -OES Data    | 5        |
| TON and TOF      | 5-6      |



**METHOXY BENZALDEHYDE, MW=136.150**

External Sample Id: SAMPLE-2 / EI+ / VJITHA-SAMPLE2  
SPLITLESS1:10:80-1M-6-200-1M-8-275-5M-5-280-ETHYLACETATE-HP5

Creation Parameters: Average(MS[1] Time:9.36..9.37)

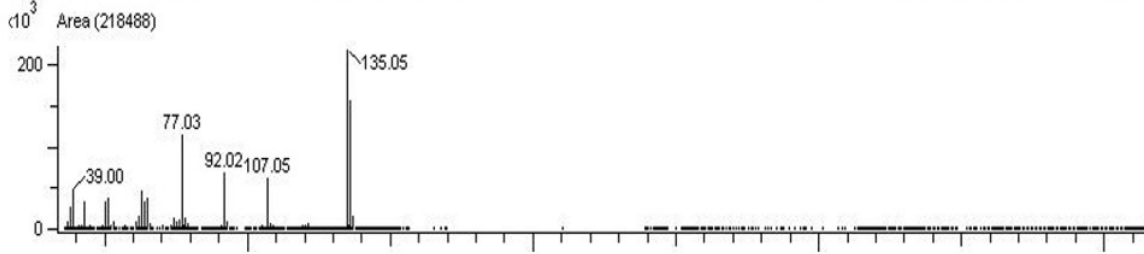

|                 |     |     |    |    |
|-----------------|-----|-----|----|----|
| m/z of fragment | 135 | 107 | 92 | 77 |
|-----------------|-----|-----|----|----|

Fig. S3: Mass Spectrum of Methoxy Benzaldehyde

**METHYL BENZALDEHYDE, MW=120.148**

External Sample Id: SAMPLE-7 / EI+ / VJITHA-SAMPLE7  
SPLITLESS1:10:80-1M-6-200-1M-8-275-5M-5-280-ETHYLACETATE-HP5

Creation Parameters: Average(MS[1] Time:23.76..23.77)

Acquired m/z Range: 35.00..800.00

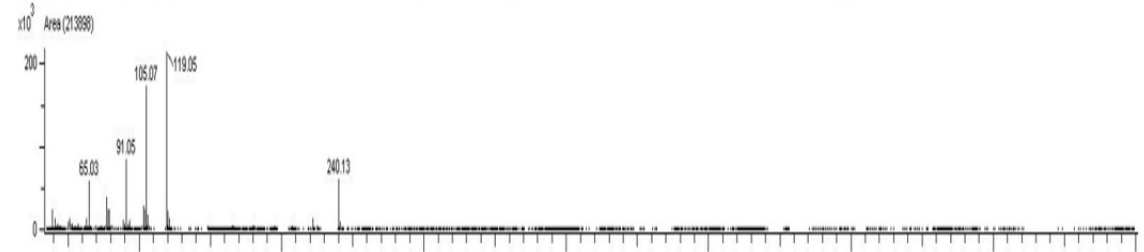

|                 |     |     |    |    |
|-----------------|-----|-----|----|----|
| m/z of fragment | 120 | 119 | 91 | 65 |
|-----------------|-----|-----|----|----|

Fig S4: Mass Spectrum of Methyl Benzaldehyde

**NITRO BENZALDEHYDE, MW =151.12**

External Sample Id: SAMPLE-8 / EH+ / VIJITHA-SAMPLE8  
 SPLITLESS1:10.80-1M-6-200-1M-8-275-5M-5-280-ETHYLACETATE-HP5

Creation Parameters: Average(MS[1] Time:11.44,.11.45)

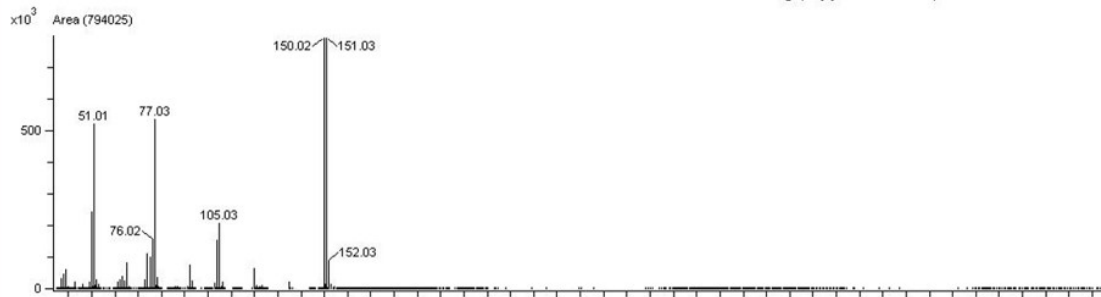

|                 |     |    |    |    |
|-----------------|-----|----|----|----|
| m/z of fragment | 150 | 77 | 51 | 50 |
|-----------------|-----|----|----|----|

Fig.S5: Mass Spectrum of Nitro Benzaldehyde

**CHLORO BENZALDEHYDE, MW =140.56**

External Sample Id: SAMPLE-4 / EH+ / VIJITHA-SAMPLE4  
 SPLITLESS1:10.80-1M-6-200-1M-8-275-5M-5-280-ETHYLACETATE-HP5

Creation Parameters: Average(MS[1] Time:6.86,.6.88)

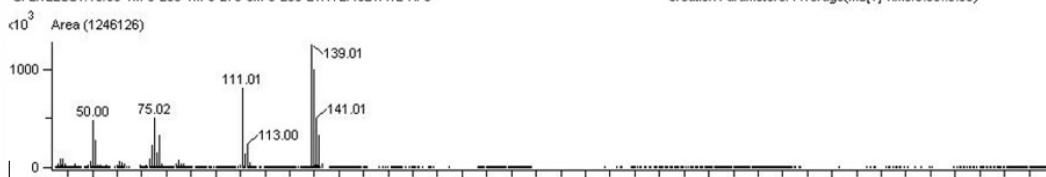

|                 |     |     |     |    |    |    |
|-----------------|-----|-----|-----|----|----|----|
| m/z of fragment | 139 | 113 | 111 | 75 | 51 | 50 |
|-----------------|-----|-----|-----|----|----|----|

Fig.S6 Mass Spectrum of Chloro Benzaldehyde

**AMINO BENZALDEHYDE, MW =121.14**

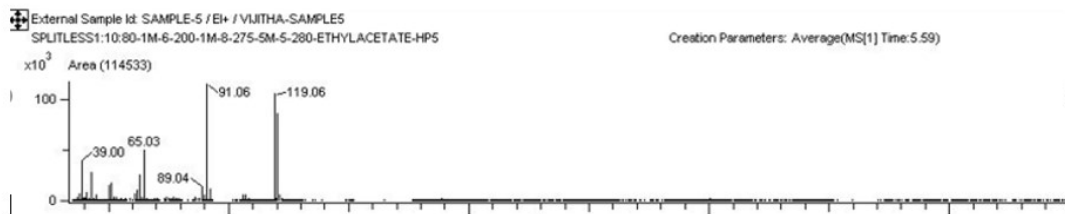

|                 |     |    |    |    |    |
|-----------------|-----|----|----|----|----|
| m/z of fragment | 119 | 91 | 89 | 65 | 39 |
|-----------------|-----|----|----|----|----|

Fig. S7: Mass Spectrum of Amino Benzaldehyde

**Table S1: ICP-OES data for Fe-Al@ HNT**

| Sr.No               | Parameter    | Test Method | Unit  | Results |
|---------------------|--------------|-------------|-------|---------|
| <b>Instrumental</b> |              |             |       |         |
| 1                   | Iron (as Fe) | ICP-OES     | mg/kg | 70130.0 |
| 2                   | Aluminium    | ICP-OES     | mg/kg | 57677.0 |

**Table S2: Catalytic activity for benzyl alcohol oxidation using different catalysts**

| SR. No. | Catalyst  | TON     | TOF <sup>(h<sup>-1</sup>)</sup> |
|---------|-----------|---------|---------------------------------|
| 1       | Fe-Al/HNT | 0.01765 | 0.01765                         |
| 2       | Al/HNT    | 0.00765 | 0.00765                         |
| 3       | Fe/HNT    | 0.00236 | 0.00236                         |
| 4       | HNT       | 0.00147 | 0.00147                         |

Reaction Conditions: 100mg of catalyst, 50 mmoles of BA, 15ml H<sub>2</sub>O<sub>2</sub>, reaction run for 1hour at 80°C

| <b>Table S3: TON for Catalyst Fe-Al/HNT</b> |       |     |                                    |
|---------------------------------------------|-------|-----|------------------------------------|
| SR. No.                                     | YIELD | TON | TOF(h <sup>-1</sup> ) <sup>a</sup> |
| 1                                           | 94    | 134 | 22                                 |
| 2                                           | 93    | 132 | 26                                 |
| 3                                           | 88    | 125 | 25                                 |
| 4                                           | 82    | 117 | 29                                 |

Reaction Conditions: BA=10mmol, Catalyst=2%, time =6h, peroxide=2ml

<sup>a</sup>TOF=TON per time in h

The TOF of the catalyst were calculated on basis of metal loading in moles and was under different time conditions
